# Supplementary material for: Plug-and-play metabolic transducers expand the chemical detection space of cell-free biosensors
Source: PubMed Central journal article supplement (PMC6461607; doi:10.1038/s41467-019-09722-9), 2019-04-12
Supplement: 41467_2019_9722_MOESM1_ESM.pdf [file 41467_2019_9722_MOESM1_ESM.pdf]

**Title:** Supplementary Data 1:

**Description:** List of biomarkers extracted from the HMDB database, the effectors that can directly detect those biomarkers, and the biomarkers that can be transformed via a metabolic reaction into a detectable molecules, along with the associated metabolic reaction and corresponding enzymes.

**Title:** Supplementary Data 2:

**Description:** List of metabolites that can be transformed into benzoate through a metabolic transducer, along with the metabolic reactions and the associated enzymes.
